# Supplementary material
Source: PubMed Central journal article supplement (PMC9747698)
Supplement: mmc1.pdf [file mmc1.pdf]

## Supplemental information

### **A delicate balance between antibody evasion and ACE2 affinity for Omicron BA.2.75**

**Jiandong Huo, Aiste Dijokaite-Guraliuc, Chang Liu, Daming Zhou, Helen M. Ginn, Raksha Das, Piyada Supasa, Muneeswaran Selvaraj, Rungtiwa Nutalai, Aekkachai Tuekprakhon, Helen M.E. Duyvesteyn, Alexander J. Mentzer, Donal Skelly, Thomas G. Ritter, Ali Amini, Sagida Bibi, Sandra Adele, Sile Ann Johnson, Neil G. Paterson, Mark A. Williams, David R. Hall, Megan Plowright, Thomas A.H. Newman, Hailey Hornsby, Thushan I. de Silva, Nigel Temperton, Paul Klenerman, Eleanor Barnes, Susanna J. Dunachie, Andrew J. Pollard, Teresa Lambe, Philip Goulder, OPTIC consortium, ISARIC4C consortium, Elizabeth E. Fry, Juthathip Mongkolsapaya, Jingshan Ren, David I. Stuart, and Gavin R. Screaton**

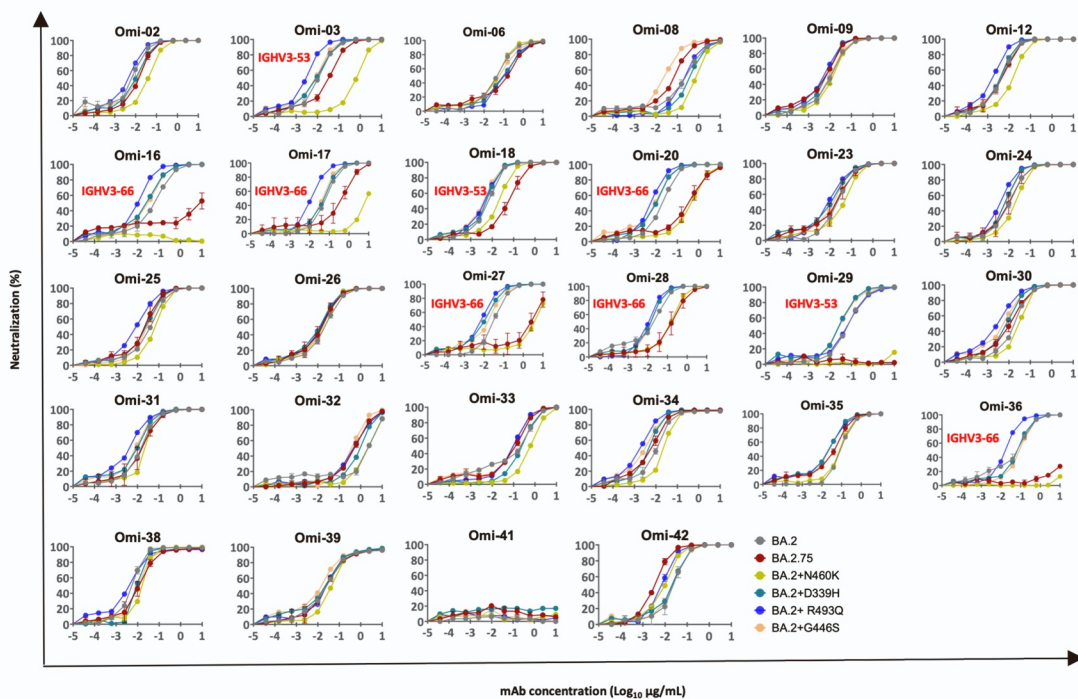

**Figure S1 Pseudoviral neutralization assays against monoclonal antibodies.** (A) Neutralization curves for a panel of 28 monoclonal antibodies made from samples taken from vaccinees infected with BA.1. Titration curves for single mutations of BA.2.27 in the BA.2 background are compared with BA.2 and BA.2.75. IC50 titres are shown in Table S2. Related to Figure 5. All assays have been done at least twice.

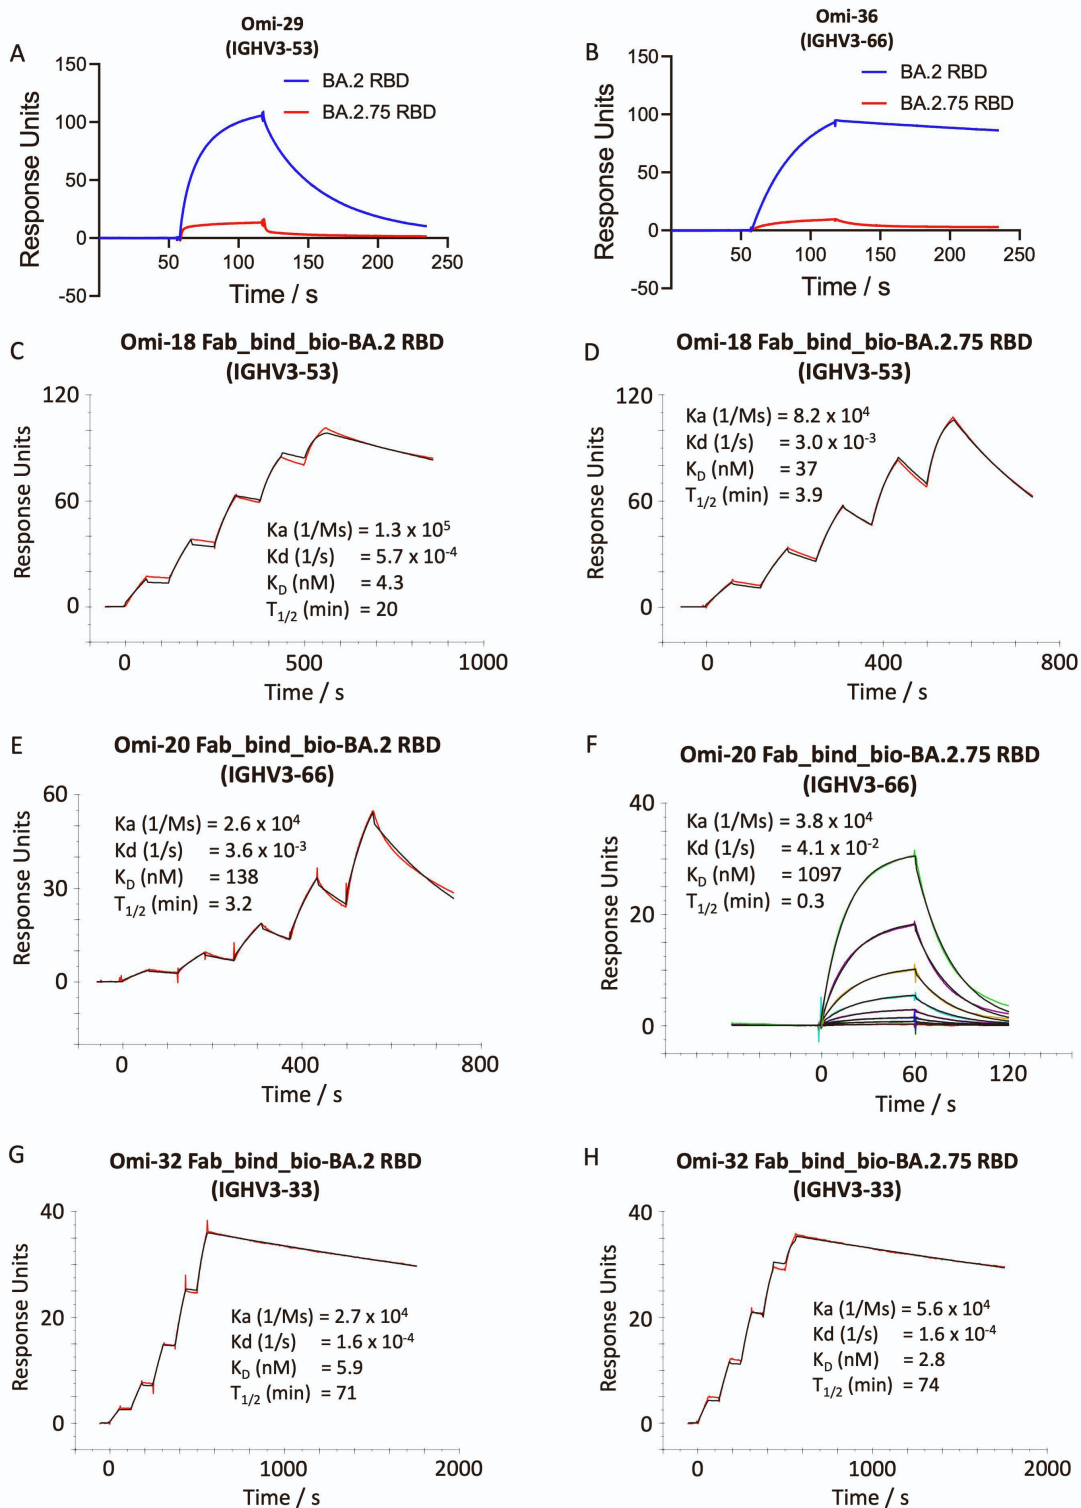

**Figure S2 Surface plasmon resonance (SPR) analysis of interaction between BA.2 or BA.2.75 RBD and selected mAbs.** (A) Binding of Omi-29 (IGHV3-53) to BA.2.75 RBD is severely reduced compared to that of BA.2, as shown by a single-injection of 1  $\mu$ M Omi-29 Fab over sample flow cells containing biotinylated BA.2 or BA.2.75 RBD. (B) Binding of Omi-36 (IGHV3-66) to BA.2.75 RBD is severely reduced compared to that of BA.2, as shown by a single-injection of 0.2  $\mu$ M BA.2 or BA.2.75 RBD over sample flow cells containing Omi-36 in the IgG form. (C-H) Sensorgrams (Red / Coloured: original binding curve; black: fitted curve) showing the interactions between BA.2 or BA.4/5 RBD and selected mAbs, with kinetics data shown. Related to Figure 5.

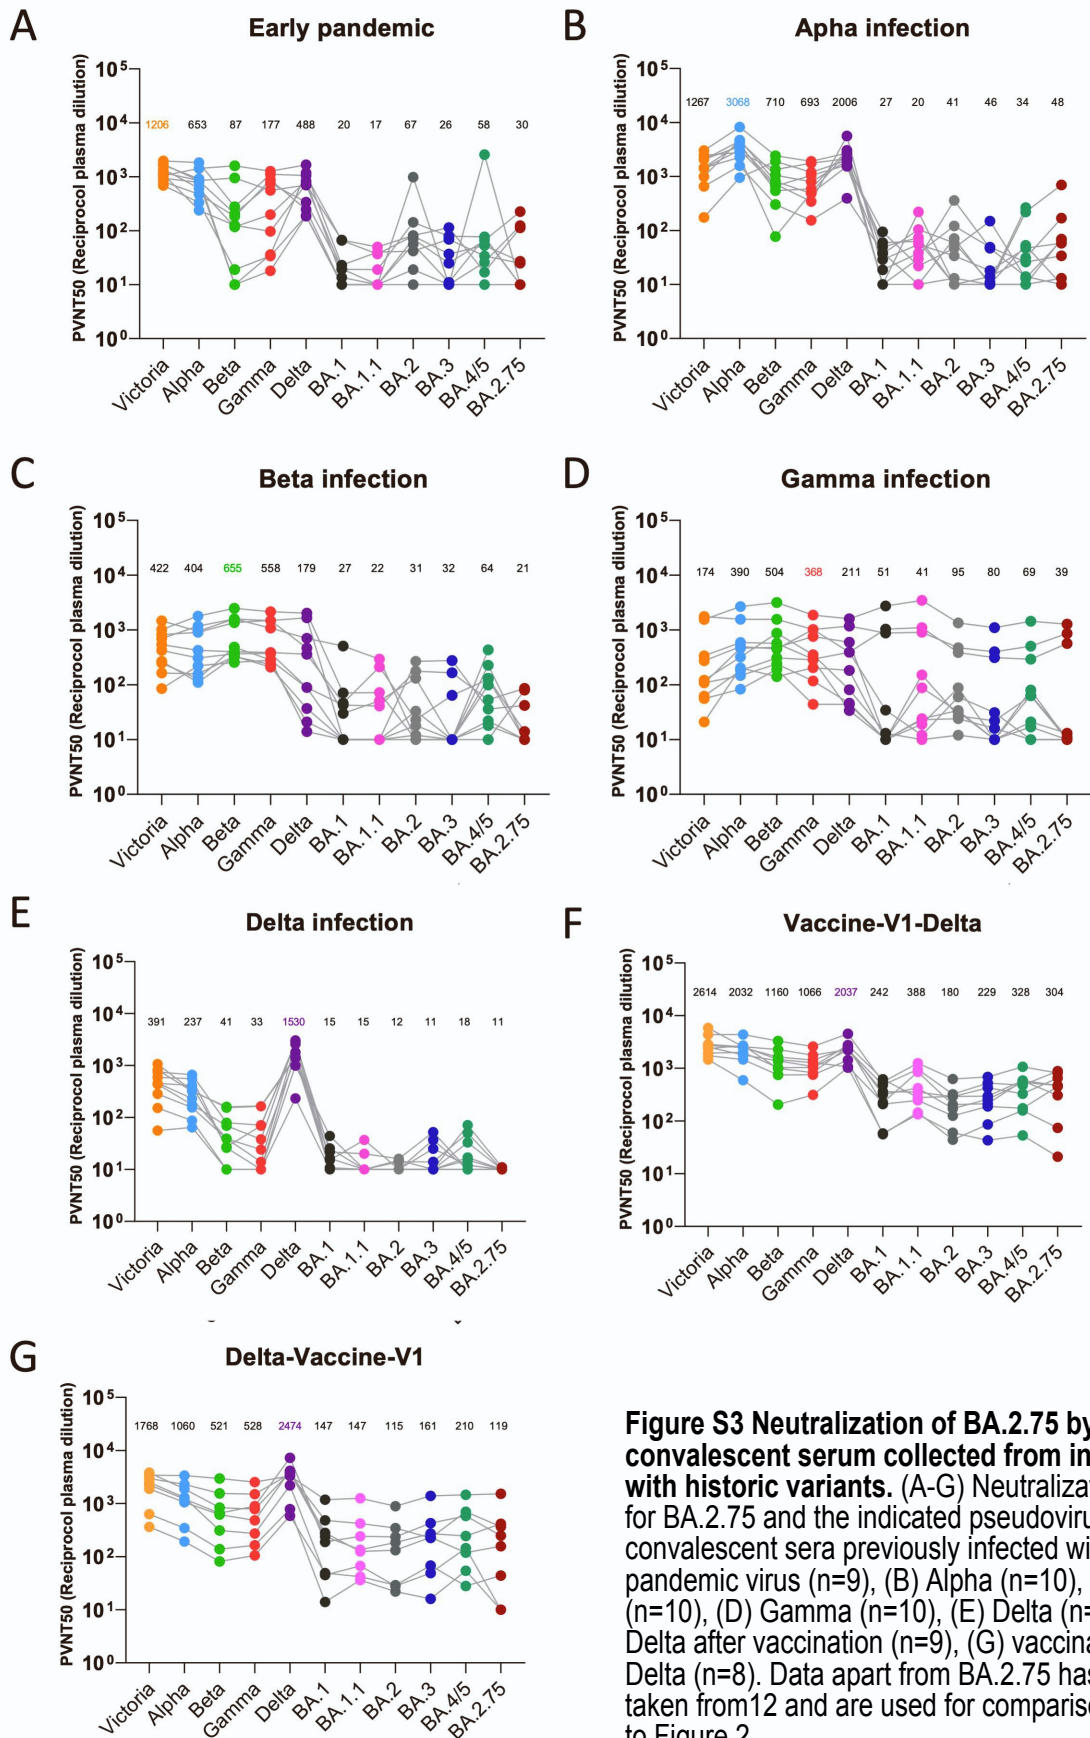

**Figure S3 Neutralization of BA.2.75 by panels of convalescent serum collected from infection with historic variants.** (A-G) Neutralization titres for BA.2.75 and the indicated pseudoviruses using convalescent sera previously infected with (A) Early pandemic virus (n=9), (B) Alpha (n=10), (C) Beta (n=10), (D) Gamma (n=10), (E) Delta (n=10), (F) Delta after vaccination (n=9), (G) vaccination after Delta (n=8). Data apart from BA.2.75 has been taken from 12 and are used for comparison. Related to Figure 2.

**Figure S3**

**Table S1. (A) IC50 of BA.1 mAbs against Victoria and Omicron variant PV including BA.2.75 and BA.2+N460K (related to Figure 5A)**

| mAbs             | Victoria      | BA.1          | BA.1.1        | BA.2          | BA.3          | BA.4/5        | BA.2.75       | BA.2+N460K    |
|------------------|---------------|---------------|---------------|---------------|---------------|---------------|---------------|---------------|
| Omi-02           | 0.002 ± 0.001 | 0.004 ± 0.001 | 0.004 ± 0.001 | 0.003 ± 0.001 | 0.019 ± 0.007 | >10           | 0.009 ± 0.002 | 0.025 ± 0.003 |
| Omi-03<br>(3-53) | 0.003 ± 0.000 | 0.005 ± 0.002 | 0.003 ± 0.001 | 0.008 ± 0.001 | 0.022 ± 0.003 | 0.017 ± 0.005 | 0.017 ± 0.000 | 0.401 ± 0.026 |
| Omi-06           | 0.007 ± 0.000 | 0.017 ± 0.003 | 0.139 ± 0.033 | 0.039 ± 0.008 | 0.696 ± 0.106 | >10           | 0.063 ± 0.005 | 0.026 ± 0.002 |
| Omi-08           | 0.008 ± 0.004 | 0.003 ± 0.000 | 0.002 ± 0.000 | 0.114 ± 0.045 | 0.032 ± 0.001 | 0.086 ± 0.005 | 0.036 ± 0.002 | 0.552 ± 0.090 |
| Omi-09           | 0.006 ± 0.002 | 0.005 ± 0.000 | 0.005 ± 0.002 | 0.008 ± 0.002 | 0.017 ± 0.002 | 0.166 ± 0.007 | 0.003 ± 0.000 | 0.010 ± 0.002 |
| Omi-12           | 0.006 ± 0.002 | 0.002 ± 0.000 | 0.002 ± 0.001 | 0.003 ± 0.001 | 0.006 ± 0.001 | 0.429 ± 0.060 | 0.003 ± 0.001 | 0.011 ± 0.002 |
| Omi-16<br>(3-66) | 0.014 ± 0.003 | 0.012 ± 0.002 | 0.011 ± 0.003 | 0.034 ± 0.012 | 0.111 ± 0.008 | 0.029 ± 0.007 | >10           | >10           |
| Omi-17<br>(3-66) | 0.023 ± 0.011 | 0.018 ± 0.012 | 0.022 ± 0.009 | 0.060 ± 0.004 | 0.123 ± 0.002 | 0.028 ± 0.001 | 0.255 ± 0.169 | >10           |
| Omi-18<br>(3-53) | 0.008 ± 0.003 | 0.002 ± 0.000 | 0.002 ± 0.000 | 0.005 ± 0.000 | 0.006 ± 0.002 | 0.005 ± 0.001 | 0.035 ± 0.007 | 0.014 ± 0.002 |
| Omi-20<br>(3-66) | 0.009 ± 0.002 | 0.006 ± 0.001 | 0.005 ± 0.001 | 0.015 ± 0.003 | 0.020 ± 0.004 | 0.014 ± 0.006 | 0.178 ± 0.075 | 0.315 ± 0.142 |
| Omi-23           | 0.005 ± 0.002 | 0.029 ± 0.006 | 0.023 ± 0.12  | 0.019 ± 0.005 | 0.011 ± 0.000 | >10           | 0.011 ± 0.006 | 0.022 ± 0.005 |
| Omi-24           | 0.005 ± 0.000 | 0.006 ± 0.002 | 0.054 ± 0.015 | 0.007 ± 0.001 | 0.009 ± 0.002 | >10           | 0.008 ± 0.004 | 0.014 ± 0.000 |
| Omi-25           | 0.005 ± 0.001 | 0.023 ± 0.005 | 0.027 ± 0.005 | 0.024 ± 0.004 | 0.050 ± 0.004 | >10           | 0.014 ± 0.005 | 0.050 ± 0.010 |
| Omi-26           | 0.002 ± 0.001 | 0.006 ± 0.002 | 0.005 ± 0.001 | 0.013 ± 0.001 | 0.018 ± 0.002 | >10           | 0.010 ± 0.004 | 0.010 ± 0.000 |
| Omi-27<br>(3-66) | 0.008 ± 0.003 | 0.026 ± 0.006 | 0.034 ± 0.009 | 0.034 ± 0.005 | 0.026 ± 0.007 | 0.069 ± 0.023 | 6.672 ± 4.466 | >10           |
| Omi-28<br>(3-66) | 0.022 ± 0.000 | 0.011 ± 0.004 | 0.009 ± 0.002 | 0.008 ± 0.000 | 0.019 ± 0.000 | 0.028 ± 0.009 | 0.133 ± 0.082 | 0.103 ± 0.048 |
| Omi-29<br>(3-53) | 0.014 ± 0.006 | 0.017 ± 0.003 | 0.016 ± 0.009 | 0.056 ± 0.014 | 0.064 ± 0.017 | 0.396 ± 0.007 | >10           | >10           |
| Omi-30           | 0.012 ± 0.002 | 0.008 ± 0.003 | 0.008 ± 0.004 | 0.011 ± 0.002 | 0.015 ± 0.003 | >10           | 0.008 ± 0.002 | 0.018 ± 0.001 |
| Omi-31           | 0.376 ± 0.090 | 0.029 ± 0.002 | 0.031 ± 0.012 | 0.013 ± 0.002 | 0.013 ± 0.004 | >10           | 0.014 ± 0.008 | 0.015 ± 0.001 |
| Omi-32           | 0.010 ± 0.006 | 0.017 ± 0.000 | >10           | 2.682 ± 0.553 | 1.018 ± 0.139 | 0.035 ± 0.016 | 0.354 ± 0.064 | 2.341 ± 0.282 |
| Omi-33           | 0.027 ± 0.011 | 0.014 ± 0.005 | 0.042 ± 0.018 | 0.068 ± 0.022 | 0.133 ± 0.021 | 0.013 ± 0.004 | 0.053 ± 0.006 | 0.490 ± 0.156 |
| Omi-34           | 0.007 ± 0.004 | 0.008 ± 0.001 | 0.062 ± 0.004 | 0.009 ± 0.003 | 0.014 ± 0.000 | >10           | 0.005 ± 0.000 | 0.020 ± 0.001 |
| Omi-35           | 0.018 ± 0.004 | 0.058 ± 0.006 | 0.381 ± 0.061 | 0.094 ± 0.004 | 0.044 ± 0.018 | 1.687 ± 0.441 | 0.020 ± 0.000 | 0.056 ± 0.012 |
| Omi-36<br>(3-66) | 0.022 ± 0.004 | 0.009 ± 0.003 | 0.009 ± 0.003 | 0.030 ± 0.014 | 0.178 ± 0.048 | 0.024 ± 0.006 | >10           | >10           |
| Omi-38           | 0.015 ± 0.004 | 0.024 ± 0.015 | >10           | 0.005 ± 0.000 | 0.008 ± 0.002 | 0.005 ± 0.001 | 0.011 ± 0.005 | 0.010 ± 0.001 |
| Omi-39           | 0.014 ± 0.002 | 0.009 ± 0.004 | >10           | 0.026 ± 0.011 | 0.014 ± 0.001 | 0.035 ± 0.003 | 0.027 ± 0.009 | 0.045 ± 0.017 |
| Omi-41           | >10           | 0.053 ± 0.028 | 0.037 ± 0.002 | >10           | 0.032 ± 0.007 | >10           | >10           | >10           |
| Omi-42           | 0.013 ± 0.004 | 0.007 ± 0.004 | 0.006 ± 0.002 | 0.021 ± 0.011 | 0.025 ± 0.012 | 0.013 ± 0.001 | 0.003 ± 0.000 | 0.007 ± 0.002 |

**(B) IC50 of commercial mAbs against PV BA.2.75 (related to Figure 5B)**

|            | IC50 (µg/mL)  |               |               |               |               |               |               |
|------------|---------------|---------------|---------------|---------------|---------------|---------------|---------------|
|            | Victoria      | BA.1          | BA.1.1        | BA.2          | BA.3          | BA.4/5        | BA.2.75       |
| REGN10987  | 0.002 ± 0.001 | >10           | >10           | 0.616 ± 0.347 | >10           | >10           | >10           |
| REGN10933  | 0.001 ± 0.002 | >10           | >10           | >10           | >10           | >10           | >10           |
| AZD1061    | 0.002 ± 0.001 | 0.308 ± 0.058 | >10           | 0.008 ± 0.003 | 0.019 ± 0.007 | 0.015 ± 0.004 | 0.021 ± 0.002 |
| AZD8895    | 0.001 ± 0.000 | 0.246 ± 0.027 | 0.100 ± 0.053 | 1.333 ± 0.317 | >10           | >10           | 0.008 ± 0.000 |
| AZD7442    | 0.001 ± 0.000 | 0.232 ± 0.113 | 0.806 ± 0.093 | 0.008 ± 0.001 | 0.065 ± 0.011 | 0.065 ± 0.007 | 0.017 ± 0.003 |
| ADG10      | 0.007 ± 0.002 | >10           | >10           | >10           | >10           | >10           | >10           |
| ADG20      | 0.003 ± 0.002 | 0.348 ± 0.169 | 0.253 ± 0.070 | >10           | >10           | >10           | >10           |
| ADG30      | 0.014 ± 0.006 | >10           | >10           | >10           | >10           | >10           | >10           |
| Ly-CoV555  | 0.002 ± 0.000 | >10           | >10           | >10           | >10           | >10           | >10           |
| Ly-CoV16   | 0.014 ± 0.010 | >10           | >10           | >10           | >10           | >10           | >10           |
| Ly-CoV1404 | 0.001 ± 0.000 | 0.002 ± 0.000 | 0.001 ± 0.000 | 0.001 ± 0.000 | 0.002 ± 0.000 | 0.002 ± 0.000 | 0.002 ± 0.000 |
| S309       | 0.079 ± 0.027 | 0.113 ± 0.006 | 0.142 ± 0.012 | 0.638 ± 0.154 | 0.311 ± 0.023 | 0.689 ± 0.041 | 0.202 ± 0.017 |

**Table S2. IC50 of BA.1 mAbs against PV BA.2, BA.2.75 and BA.2 with each of the four BA.2.75 mutations (see also Figure S1, related to Figure 5)**

| mAbs  | IC50 (µg/ml)  |               |               |               |               |               |
|-------|---------------|---------------|---------------|---------------|---------------|---------------|
|       | BA.2          | BA.2+D339H    | BA.2+R493Q    | BA.2+G446S    | BA.2.+ N460K  | BA.2.75       |
| Omi02 | 0.003 ± 0.000 | 0.007 ± 0.003 | 0.003 ± 0.000 | 0.007 ± 0.002 | 0.025 ± 0.003 | 0.009 ± 0.002 |
| Omi03 | 0.008 ± 0.001 | 0.006 ± 0.000 | 0.002 ± 0.001 | 0.005 ± 0.001 | 0.401 ± 0.026 | 0.017 ± 0.000 |
| Omi06 | 0.039 ± 0.008 | 0.012 ± 0.002 | 0.023 ± 0.010 | 0.087 ± 0.002 | 0.026 ± 0.002 | 0.063 ± 0.005 |
| Omi08 | 0.114 ± 0.045 | 0.250 ± 0.009 | 0.194 ± 0.020 | 0.017 ± 0.001 | 0.552 ± 0.090 | 0.036 ± 0.002 |
| Omi09 | 0.008 ± 0.002 | 0.005 ± 0.001 | 0.003 ± 0.000 | 0.006 ± 0.001 | 0.010 ± 0.002 | 0.003 ± 0.000 |
| Omi12 | 0.003 ± 0.001 | 0.003 ± 0.001 | 0.001 ± 0.000 | 0.003 ± 0.001 | 0.011 ± 0.002 | 0.003 ± 0.001 |
| Omi16 | 0.034 ± 0.012 | 0.014 ± 0.004 | 0.008 ± 0.003 | 0.018 ± 0.004 | >10           | >10           |
| Omi17 | 0.060 ± 0.004 | 0.036 ± 0.015 | 0.013 ± 0.001 | 0.038 ± 0.002 | >10           | 0.255 ± 0.169 |
| Omi18 | 0.005 ± 0.000 | 0.003 ± 0.000 | 0.004 ± 0.000 | 0.003 ± 0.000 | 0.014 ± 0.002 | 0.035 ± 0.007 |
| Omi20 | 0.015 ± 0.003 | 0.007 ± 0.000 | 0.005 ± 0.001 | 0.005 ± 0.001 | 0.315 ± 0.142 | 0.178 ± 0.075 |
| Omi23 | 0.019 ± 0.005 | 0.006 ± 0.000 | 0.007 ± 0.000 | 0.010 ± 0.002 | 0.022 ± 0.005 | 0.011 ± 0.006 |
| Omi24 | 0.007 ± 0.001 | 0.005 ± 0.001 | 0.004 ± 0.000 | 0.005 ± 0.000 | 0.014 ± 0.000 | 0.008 ± 0.004 |
| Omi25 | 0.024 ± 0.004 | 0.016 ± 0.003 | 0.007 ± 0.002 | 0.022 ± 0.000 | 0.050 ± 0.010 | 0.014 ± 0.005 |
| Omi26 | 0.013 ± 0.001 | 0.007 ± 0.002 | 0.008 ± 0.001 | 0.008 ± 0.002 | 0.010 ± 0.000 | 0.010 ± 0.004 |
| Omi27 | 0.034 ± 0.006 | 0.007 ± 0.001 | 0.007 ± 0.001 | 0.011 ± 0.001 | >10           | 6.672 ± 4.466 |
| Omi28 | 0.008 ± 0.000 | 0.009 ± 0.001 | 0.010 ± 0.001 | 0.014 ± 0.000 | 0.103 ± 0.048 | 0.133 ± 0.082 |
| Omi29 | 0.056 ± 0.014 | 0.018 ± 0.006 | 0.042 ± 0.012 | 0.024 ± 0.002 | >10           | >10           |
| Omi30 | 0.013 ± 0.002 | 0.006 ± 0.001 | 0.002 ± 0.000 | 0.003 ± 0.000 | 0.018 ± 0.001 | 0.008 ± 0.002 |
| Omi31 | 0.011 ± 0.002 | 0.005 ± 0.001 | 0.003 ± 0.000 | 0.005 ± 0.001 | 0.015 ± 0.001 | 0.014 ± 0.008 |
| Omi32 | 2.614 ± 0.533 | 0.683 ± 0.179 | 0.312 ± 0.008 | 0.330 ± 0.010 | 2.341 ± 0.282 | 0.354 ± 0.064 |
| Omi33 | 0.070 ± 0.024 | 0.177 ± 0.035 | 0.063 ± 0.008 | 0.043 ± 0.016 | 0.490 ± 0.156 | 0.053 ± 0.006 |
| Omi34 | 0.009 ± 0.003 | 0.004 ± 0.000 | 0.002 ± 0.000 | 0.002 ± 0.000 | 0.020 ± 0.001 | 0.005 ± 0.000 |
| Omi35 | 0.092 ± 0.004 | 0.012 ± 0.003 | 0.017 ± 0.011 | 0.014 ± 0.006 | 0.056 ± 0.012 | 0.020 ± 0.000 |
| Omi36 | 0.030 ± 0.014 | 0.036 ± 0.002 | 0.013 ± 0.003 | 0.067 ± 0.015 | >10           | >10           |
| Omi38 | 0.005 ± 0.000 | 0.011 ± 0.000 | 0.003 ± 0.001 | 0.010 ± 0.000 | 0.010 ± 0.001 | 0.011 ± 0.005 |
| Omi39 | 0.026 ± 0.011 | 0.012 ± 0.002 | 0.021 ± 0.007 | 0.009 ± 0.002 | 0.045 ± 0.017 | 0.027 ± 0.009 |
| Omi41 | >10           | >10           | >10           | >10           | >10           | >10           |
| Omi42 | 0.021 ± 0.011 | 0.011 ± 0.002 | 0.006 ± 0.001 | 0.016 ± 0.002 | 0.007 ± 0.002 | 0.003 ± 0.000 |

|                     | Delta-V1-Vaccine | Vaccine-V1_Delta | Delta            | Gamma            | Beta             | Alpha            | Early pandemic   | BNT162b2 V3+28   | AZV3+28          | BA.4/5 infection | BA.2 infection   | BA.1 infection   |
|---------------------|------------------|------------------|------------------|------------------|------------------|------------------|------------------|------------------|------------------|------------------|------------------|------------------|
| <b>Participants</b> |                  |                  |                  |                  |                  |                  |                  |                  |                  |                  |                  |                  |
| Female              | 7                | 7                | 7                | 7                | 7                | 7                | 7                | 7                | 7                | 7                | 7                | 7                |
| Male                | 4                | 4                | 3                | 4                | 5                | 6                | 9                | 10               | 21               | 5                | 4                | 7                |
| Median Age (Y)      | 41 (Range 31-54) | 40 (Range 28-70) | 26 (Range 12-36) | 32 (Range 23-49) | 47 (Range 16-64) | 57 (Range 29-76) | 60 (Range 53-69) | 45 (Range 30-59) | 37 (Range 25-53) | 42 (Range 20-94) | 41 (Range 22-57) | 22 (Range 21-56) |

**Table S3. Sample participant information.**

**Table S4. Primers used for site-directed PCR mutagenesis to generate the BA.2.75 construct using the BA.2 Spike construct as template (related to methods)**

| Primer ID           | Sequence                                                                                           |
|---------------------|----------------------------------------------------------------------------------------------------|
| D339H_pNeoF         | 5' -GGTTGCGTAGCTGAAACCGGTACCAATCTGTGCCCTTCCACGAGGTGTTCAATGCCACC-3'                                 |
| G446S_F             | 5' -CAAAC TAGATTTCGAAAGTTAGCGGCAATTACAATTACCTG-3'                                                  |
| G446S_R             | 5' -CAGGTAATTGTAATTGCCGCTAACTTTCGAATCTAGTTTG-3'                                                    |
| N460K_F             | 5' -CAGACTGTTTCAGAAAGAGCAAACCTGAAGCCTTTCGAGAGAGAC-3'                                               |
| N460K_R             | 5' -GTCTCTCTCGAAAGGCTTCAGTTTGCTCTTCTGAACAGTCTG-3'                                                  |
| R493Q_F (RBD)       | 5' -CAATTGCTACTTCCCTCTGCAGAGCTACGGCTTCAGACCTACC-3'                                                 |
| R493Q_R (RBD)       | 5' -GGTAGGTCTGAAGCCGTAGCTCTGCAGAGGGAAGTAGCAATTG-3'                                                 |
| RBD333_BAP_R        | 5' -GTCATTCAGCAAGCTCTTCTTGCCGCACACGGTAGC-3'                                                        |
| pNeoRBD333Omi_F     | 5' -GGTTGCGTAGCTGAAACCGGTCATCACCATCACCATCACACCAATCTGTGCCCTTTCGAC-3'                                |
| K147E_W152R_F157L_F | 5' -CGTTTATTATCATGAGAACAACAAGAGCAGGATGGAGAGCGAGTTACGCGTATATTCGTCGGC-3'                             |
| K147E_W152R_F157L_R | 5' -GCCGACGAATATACGCGTAACTCGCTCTCCATCCTGCTCTTGTGTTCTCATGATAATAAACG-3'                              |
| I210L_F             | 5' -CAGCAAGCACACACCCGTTAATCTGGGCAGAGACC-3'                                                         |
| I210L_R             | 5' -GGTCTCTGCCAGATTAACGGGTGTGTGCTTGCTG-3'                                                          |
| G275S_F             | 5' -GCGATTCGTCAAGCAGTTGGACCGCTGGAGC-3'                                                             |
| G275S_R             | 5' -GCTCCAGCGGTCCAACCTGCTTGACGAATCGC-3'                                                            |
| D339H_F             | 5' -CAATCTGTGCCCTTCCACGAGGTGTTCAATGC-3'                                                            |
| D339H_R             | 5' -GCATTGAACACCTCGTGGAAGGGCAGAGATTG-3'                                                            |
| G446S_N460K_F       | 5' -GAACTCTAACAACTAGATTTCGAAAGTTAGCGGCAATTACAATTACCTGTACAGACTGTTTCAGAAAGAGCAAGCTGAAGCCTTTCGAGAG-3' |
| G446S_N460K_R       | 5' -CTCTCGAAAGGCTTCAGCTTGCTCTTCTGAACAGTCTGTACAGGTAATTGTAATTGCCGCTAACTTTCGAATCTAGTTTGTAGAGTTC-3'    |
| R493Q_F             | 5' -GCTTCAATTGCTACTTCCCTCTGCAGAGCTACGGCTTCAGACCTACC-3'                                             |
| R493Q_R             | 5' -GGTAGGTCTGAAGCCGTAGCTCTGCAGAGGGAAGTAGCAATTGAAGC-3'                                             |



**Table S5. X-ray data collection and structure refinement statistics (related to Figure 4)**

<sup>a</sup> Values in parentheses are for highest-resolution shell.

|                                       |                                  |
|---------------------------------------|----------------------------------|
| Structure                             | BA.2.75 RBD/ACE2                 |
| PDB ID                                | 8ASY                             |
| Data collection                       |                                  |
| Space group                           | P4 <sub>1</sub> 2 <sub>1</sub> 2 |
| Cell dimensions                       |                                  |
| a, b, c (Å)                           | 105.3, 105.3, 220.8              |
| a, b, g (°)                           | 90, 90, 90                       |
| Resolution (Å)                        | 76–2.85 (2.80–2.85) <sup>a</sup> |
| R <sub>merge</sub>                    | 0.443 (---)                      |
| R <sub>pim</sub>                      | 0.086 (1.401)                    |
| I/s(I)                                | 7.6 (0.4)                        |
| CC <sub>1/2</sub>                     | 0.971 (0.279)                    |
| Completeness (%)                      | 99.8 (96.9)                      |
| Redundancy                            | 26.8 (25.7)                      |
| Refinement                            |                                  |
| Resolution (Å)                        | 76–2.85                          |
| No. reflections                       | 2089/1439                        |
| R <sub>work</sub> / R <sub>free</sub> | 0.217/0.265                      |
| No. atoms                             |                                  |
| Protein                               | 6464                             |
| Ligand/ion/water                      | 167                              |
| B factors (Å <sup>2</sup> )           |                                  |
| Protein                               | 86                               |
| Ligand/ion/water                      | 108                              |
| r.m.s. deviations                     |                                  |
| Bond lengths (Å)                      | 0.002                            |
| Bond angles (°)                       | 0.4                              |
